# Supplementary material for: Increasing Adherence to Adjuvant Hormone Therapy Among Patients With Breast Cancer: A Smart Phone App-Based Pilot Study
Source: PubMed Central journal article supplement — Cancer Control. 2019 Nov 18;26(1):1073274819883287. doi: 10.1177/1073274819883287 (PMC6862779; doi:10.1177/1073274819883287), 2019-11-18
Supplement: supplemental_table_1.pdf [file supplemental_table_1.pdf]

### **Appendix 1. Daily text messages for patient participants**

|     |                                                                                  |
|-----|----------------------------------------------------------------------------------|
| 1.  | This is a friendly reminder to take your medication                              |
| 2.  | Time to take your medication                                                     |
| 3.  | Spring into action and take your medication                                      |
| 4.  | Your medication says "Take me now please."                                       |
| 5.  | Hand to pills to mouth time                                                      |
| 6.  | Stop, drop and pop your pills!                                                   |
| 7.  | Don't forget to take your medication today.                                      |
| 8.  | Stop everything! It's medication time!                                           |
| 9.  | Your medication says, "Find me and take me!"                                     |
| 10. | The thing about remembering to take your medication is that you don't forget.    |
| 11. | It's a great time to take your medication.                                       |
| 12. | She places her medication in her mouth, big gulp...Score!                        |
| 13. | I'm reminding you to take your medication.                                       |
| 14. | Step to the left, grab your medication. Step to the right, take your medication. |
