# Supplementary material for: Increasing Adherence to Adjuvant Hormone Therapy Among Patients With Breast Cancer: A Smart Phone App-Based Pilot Study
Source: PubMed Central journal article supplement — Cancer Control. 2019 Nov 18;26(1):1073274819883287. doi: 10.1177/1073274819883287 (PMC6862779; doi:10.1177/1073274819883287), 2019-11-18
Supplement: supplemental_table_2.pdf [file supplemental_table_2.pdf]

**Appendix 2. Weekly messages received by adherent patient participants**

|                                     |
|-------------------------------------|
| 1. Well done!                       |
| 2. Keep up the good work!           |
| 3. Way to go!                       |
| 4. Nice job!                        |
| 5. Keep it up!                      |
| 6. Fantastic!                       |
| 7. Great job staying on track!      |
| 8. Wonderful!                       |
| 9. Sweet!                           |
| 10. You're taking care of yourself! |
| 11. Awesome!                        |
| 12. Keep the streak alive!          |
